# Supplementary material for: A relativistic DFT methodology for calculating the structures and NMR chemical shifts of octahedral platinum and iridium complexes
Source: Royal Society of Chemistry journal article supplement (doi:10.1039/c3cp44440f), 2013-01-01
Supplement: c3cp44440f.pdf [file c3cp44440f.pdf]

## SUPPORTING INFORMATION

A relativistic DFT methodology for calculating the  
structures and NMR chemical shifts of octahedral  
platinum and iridium complexes

*Jan Vicha, Michael Patzschke, Radek Marek*

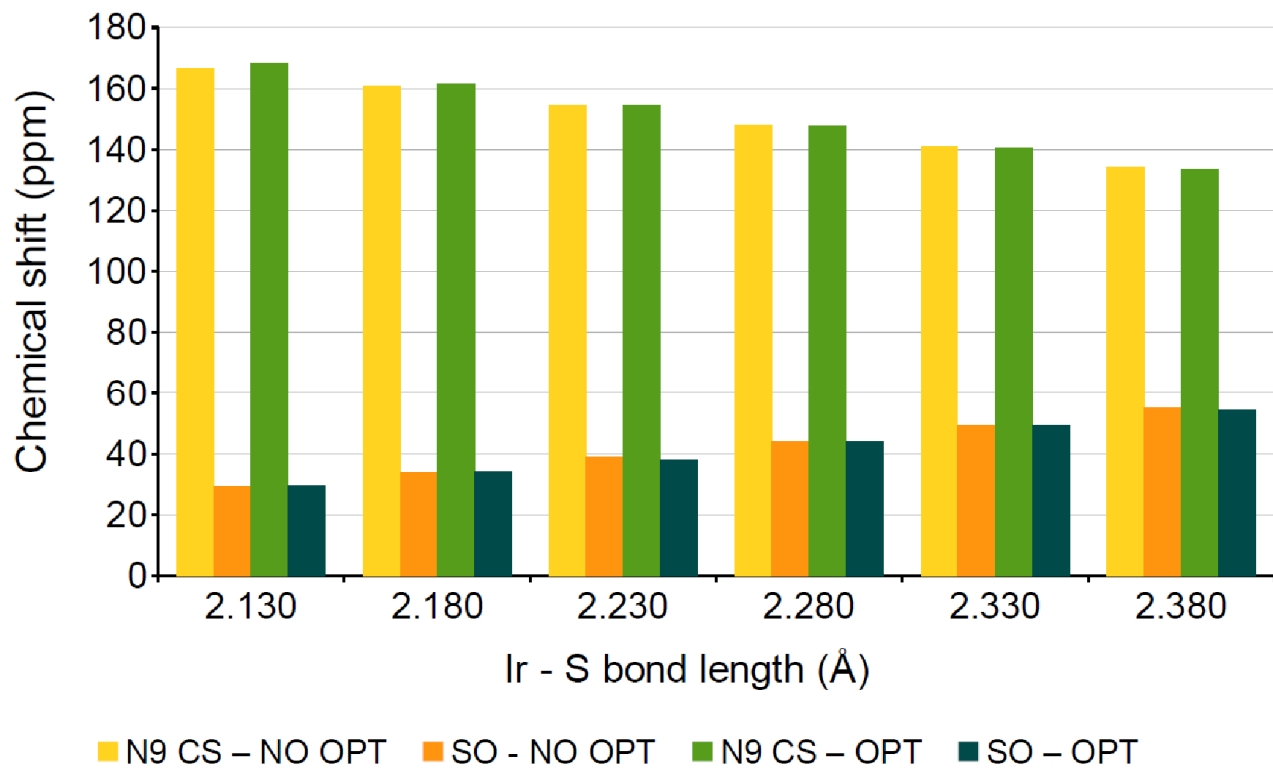

**Figure S1:** The  $^{15}\text{N}$  NMR chemical shift (CS) and spin-orbit (SO) contribution to the chemical shift for IrBAP calculated as a function of Ir-S distance using flexible and rigid geometries.

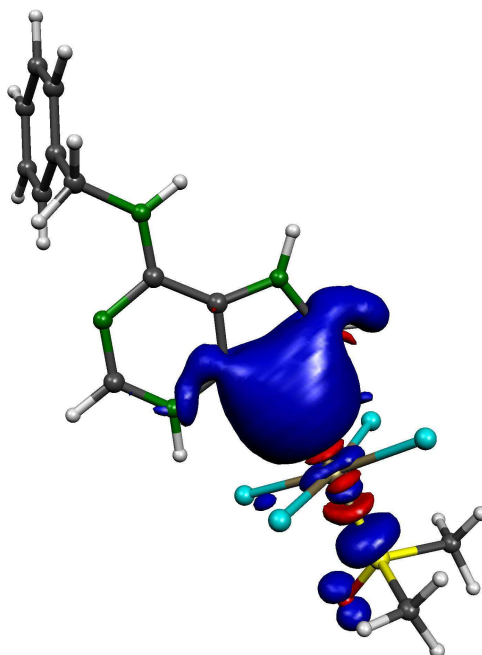

**Figure S2:** Visualization of the spin density induced by the FC perturbation on N9 atom for IrBAP with Ir-S bond length 2.13Å re-optimized using PBE0/TZVPP/COSMO.

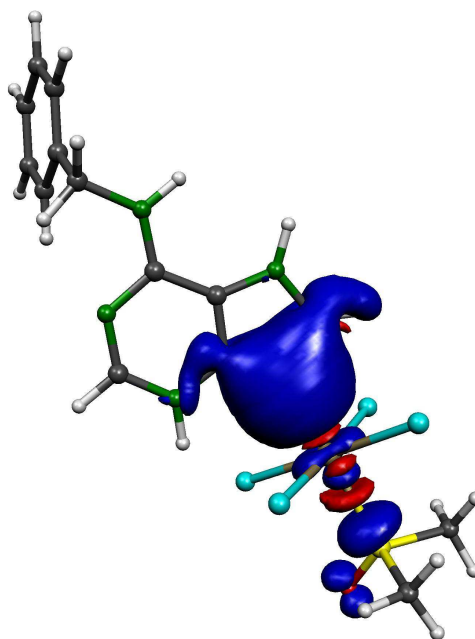

**Figure S3:** Visualization of the spin density induced by the FC perturbation on N9 atom for IrBAP with Ir-S bond length 2.38Å re-optimized using PBE0/TZVPP/COSMO.

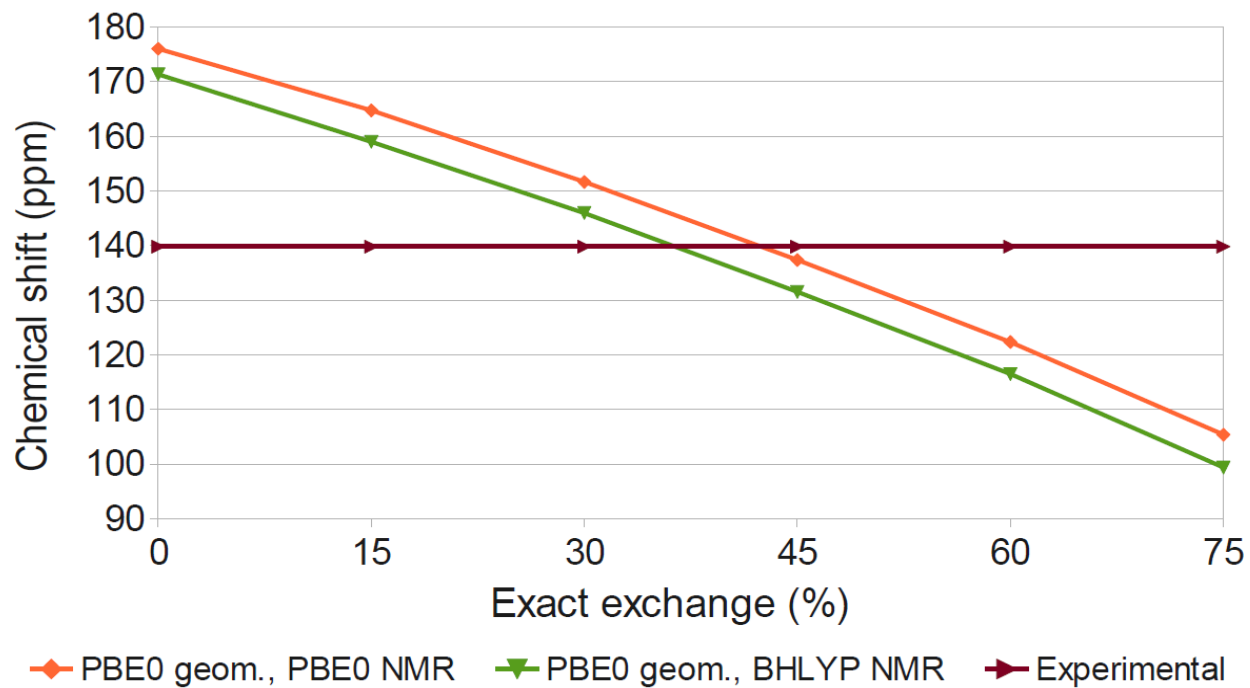

**Figure S4:** The  $^{15}\text{N}$  NMR chemical shift of the N9 atom of PtKIN calculated using the BHandHLYP and PBE0 functionals (TZP/COSMO) with various amounts of exact-exchange admixture. The PBE0 geometry, optimized with the COSMO solvent model, was used.

**Table S1:** Experimental NMR chemical shifts for PtKIN and IrBAP at 303K; different pH.

| Atom | PtKIN |          | Atom   | IrBAP |          |
|------|-------|----------|--------|-------|----------|
|      | DMF   | 0.1M HCl |        | DMSO  | 0.1M HCl |
| H2   | 8.8   | 8.9      | H2     | 8.8   | 8.8      |
| H8   | 8.6   | 9.1      | H8     | 8.9   | 9.0      |
| H10  | 9.8   | 10.9     | H10    | 9.8   | 10.6     |
| H11  | 5.0   | 5.0      | H11    | 4.9   | 4.9      |
| H13  | 6.4   | 6.4      | H13.17 | 7.4   | 7.4      |
| H14  | 6.5   | 6.6      | H14.16 | 7.4   | 7.4      |
| H15  | 7.7   | 7.7      | H15    | 7.3   | 7.3      |
|      |       |          | H18.19 | 3.5   | 3.4      |
| C2   | 146.0 | 147.2    | C2     | 146.4 | 146.9    |
| C4   | 143.8 | 142.7    | C4     | 144.7 | 144.5    |
| C5   | 117.9 | 114.3    | C5     | 111.8 | 111.0    |
| C6   | 155.0 | 153.8    | C6     | 152.3 | 152.6    |
| C8   | 148.5 | 146.2    | C8     | 148.1 | 147.1    |
| C11  | 38.5  | 38.0     | C11    | 44.3  | 44.3     |
| C12  | 151.6 | 150.6    | C12    | 136.4 | 136.4    |
| C13  | 108.7 | 108.5    | C13.17 | 127.6 | 127.6    |
| C14  | 111.2 | 110.9    | C14.16 | 128.4 | 128.5    |
| C15  | 143.4 | 143.1    | C15    | 127.5 | 127.5    |
|      |       |          | C18.19 | 40.6  | 40.8     |
| N1   | 226.6 | 228.1    | N1     | 227.2 | 227.6    |
| N3   | 153.8 | 153.4    | N3     | 154.5 | 154.2    |
| N7   | 211.2 | 185.3    | N7     | -     | 162.7    |
| N9   | 139.8 | 144.0    | N9     | 150.3 | 150.9    |
| N10  | 105.5 | 114.7    | N10    | 114.2 | 118.7    |

**Table S2a:** Geometrical parameters and RMSDs for PtBAP cluster.

|             | Experimental | BLYP  | B3LYP | BHLYP | BP86  | TPSS  | PBE   | PBE0  |
|-------------|--------------|-------|-------|-------|-------|-------|-------|-------|
| Bond        | (Å)          | (Å)   | (Å)   | (Å)   | (Å)   | (Å)   | (Å)   | (Å)   |
| N1 C2       | 1.307        | 1.322 | 1.311 | 1.301 | 1.320 | 1.319 | 1.319 | 1.309 |
| N1 C6       | 1.356        | 1.366 | 1.354 | 1.343 | 1.362 | 1.361 | 1.360 | 1.349 |
| N3 C2       | 1.343        | 1.360 | 1.347 | 1.334 | 1.356 | 1.355 | 1.355 | 1.341 |
| N3 C4       | 1.349        | 1.363 | 1.355 | 1.346 | 1.360 | 1.358 | 1.359 | 1.350 |
| C4 C5       | 1.368        | 1.405 | 1.391 | 1.376 | 1.402 | 1.397 | 1.402 | 1.387 |
| C5 C6       | 1.415        | 1.429 | 1.420 | 1.412 | 1.426 | 1.423 | 1.426 | 1.417 |
| N7 C8       | 1.331        | 1.348 | 1.334 | 1.319 | 1.345 | 1.341 | 1.344 | 1.329 |
| N7 C5       | 1.379        | 1.386 | 1.377 | 1.370 | 1.379 | 1.380 | 1.378 | 1.370 |
| N9 C8       | 1.341        | 1.353 | 1.341 | 1.330 | 1.350 | 1.348 | 1.349 | 1.337 |
| N9 C4       | 1.373        | 1.374 | 1.364 | 1.354 | 1.370 | 1.368 | 1.369 | 1.358 |
| N10 C6      | 1.326        | 1.349 | 1.336 | 1.324 | 1.345 | 1.343 | 1.345 | 1.331 |
| Pt1 N9      | 2.050        | 2.092 | 2.076 | 2.060 | 2.064 | 2.063 | 2.062 | 2.045 |
| Pt1 Cl5     | 2.298        | 2.348 | 2.323 | 2.300 | 2.323 | 2.319 | 2.319 | 2.285 |
| Pt1 Cl2     | 2.315        | 2.434 | 2.356 | 2.357 | 2.360 | 2.352 | 2.355 | 2.346 |
| Pt1 Cl1     | 2.315        | 2.397 | 2.386 | 2.328 | 2.385 | 2.379 | 2.382 | 2.323 |
| Pt1 Cl3     | 2.321        | 2.399 | 2.373 | 2.326 | 2.360 | 2.352 | 2.370 | 2.322 |
| Pt1 Cl4     | 2.327        | 2.416 | 2.354 | 2.343 | 2.374 | 2.369 | 2.356 | 2.336 |
| <b>RMSD</b> |              | 0.050 | 0.027 | 0.014 | 0.029 | 0.025 | 0.027 | 0.011 |

**Table S2b:** Geometrical parameters and RMSDs for PtBAP cluster.

|             | BHLYP-D3 | PBE-D2 | PBE-D3 | PBE0-D3 | PBE0-TZVPP | PBE0-D3 TZVPP | BHLYP TZVPP |
|-------------|----------|--------|--------|---------|------------|---------------|-------------|
| Bond        | (Å)      | (Å)    | (Å)    | (Å)     | (Å)        | (Å)           | (Å)         |
| N1 C2       | 1.302    | 1.321  | 1.320  | 1.309   | 1.305      | 1.305         | 1.297       |
| N1 C6       | 1.345    | 1.362  | 1.361  | 1.350   | 1.347      | 1.348         | 1.340       |
| N3 C2       | 1.334    | 1.355  | 1.356  | 1.342   | 1.336      | 1.337         | 1.329       |
| N3 C4       | 1.346    | 1.358  | 1.359  | 1.350   | 1.345      | 1.345         | 1.341       |
| C4 C5       | 1.377    | 1.401  | 1.403  | 1.388   | 1.379      | 1.380         | 1.367       |
| C5 C6       | 1.412    | 1.425  | 1.426  | 1.417   | 1.409      | 1.409         | 1.404       |
| N7 C8       | 1.319    | 1.343  | 1.344  | 1.329   | 1.325      | 1.325         | 1.314       |
| N7 C5       | 1.372    | 1.378  | 1.380  | 1.371   | 1.369      | 1.370         | 1.368       |
| N9 C8       | 1.331    | 1.349  | 1.350  | 1.338   | 1.333      | 1.334         | 1.326       |
| N9 C4       | 1.356    | 1.368  | 1.370  | 1.359   | 1.356      | 1.357         | 1.352       |
| N10 C6      | 1.324    | 1.344  | 1.345  | 1.331   | 1.327      | 1.326         | 1.319       |
| Pt1 N9      | 2.057    | 2.060  | 2.061  | 2.045   | 2.051      | 2.049         | 2.064       |
| Pt1 C15     | 2.306    | 2.324  | 2.322  | 2.299   | 2.290      | 2.294         | 2.296       |
| Pt1 C12     | 2.363    | 2.389  | 2.387  | 2.350   | 2.341      | 2.346         | 2.354       |
| Pt1 C11     | 2.336    | 2.365  | 2.361  | 2.328   | 2.315      | 2.321         | 2.321       |
| Pt1 C13     | 2.334    | 2.365  | 2.362  | 2.327   | 2.317      | 2.323         | 2.323       |
| Pt1 C14     | 2.347    | 2.374  | 2.372  | 2.339   | 2.334      | 2.336         | 2.343       |
| <b>RMSD</b> | 0.016    | 0.030  | 0.029  | 0.012   | 0.010      | 0.010         | 0.015       |

**Table S3a:** Geometrical parameters and RMSDs for IrADEC3 cluster.

|             | Experimental | BLYP  | B3LYP | BHLYP | BP86  | TPSS  | PBE   | PBE0  |
|-------------|--------------|-------|-------|-------|-------|-------|-------|-------|
| Bond        | (Å)          | (Å)   | (Å)   | (Å)   | (Å)   | (Å)   | (Å)   | (Å)   |
| N1 C2       | 1.301        | 1.322 | 1.311 | 1.299 | 1.320 | 1.318 | 1.319 | 1.307 |
| N1 C6       | 1.346        | 1.371 | 1.359 | 1.347 | 1.366 | 1.365 | 1.365 | 1.353 |
| N3 C2       | 1.352        | 1.367 | 1.352 | 1.338 | 1.361 | 1.360 | 1.360 | 1.345 |
| N3 C4       | 1.361        | 1.370 | 1.360 | 1.351 | 1.364 | 1.363 | 1.363 | 1.354 |
| C4 C5       | 1.362        | 1.406 | 1.393 | 1.379 | 1.403 | 1.399 | 1.403 | 1.389 |
| C5 C6       | 1.396        | 1.429 | 1.421 | 1.412 | 1.427 | 1.424 | 1.427 | 1.418 |
| N7 C8       | 1.332        | 1.350 | 1.337 | 1.333 | 1.348 | 1.344 | 1.347 | 1.333 |
| N7 C5       | 1.386        | 1.383 | 1.375 | 1.369 | 1.379 | 1.379 | 1.377 | 1.370 |
| N9 C8       | 1.324        | 1.350 | 1.337 | 1.325 | 1.347 | 1.344 | 1.346 | 1.333 |
| N9 C4       | 1.375        | 1.374 | 1.363 | 1.351 | 1.368 | 1.366 | 1.367 | 1.356 |
| N10 C6      | 1.308        | 1.348 | 1.335 | 1.322 | 1.344 | 1.342 | 1.350 | 1.329 |
| Ir1 N9      | 2.069        | 2.102 | 2.090 | 2.084 | 2.080 | 2.079 | 2.081 | 2.071 |
| Ir1 S1      | 2.231        | 2.299 | 2.298 | 2.305 | 2.267 | 2.271 | 2.261 | 2.261 |
| Ir1 Cl2     | 2.344        | 2.449 | 2.422 | 2.401 | 2.375 | 2.377 | 2.374 | 2.355 |
| Ir1 Cl1     | 2.358        | 2.413 | 2.391 | 2.372 | 2.410 | 2.409 | 2.405 | 2.383 |
| Ir1 Cl3     | 2.358        | 2.456 | 2.425 | 2.402 | 2.419 | 2.412 | 2.416 | 2.387 |
| Ir1 Cl4     | 2.351        | 2.417 | 2.391 | 2.414 | 2.385 | 2.380 | 2.382 | 2.357 |
| <b>RMSD</b> |              | 0.049 | 0.035 | 0.032 | 0.030 | 0.029 | 0.029 | 0.017 |



**Table S3b:** Geometrical parameters and RMSDs for IrADEC3 cluster.

|             | BHLYP-D3 | PBE-D2 | PBE-D3 | PBE0-D3 | PBE0-TZVPP | PBE0-D3 TZVPP | BHLYP TZVPP |
|-------------|----------|--------|--------|---------|------------|---------------|-------------|
| Bond        | (Å)      | (Å)    | (Å)    | (Å)     | (Å)        | (Å)           | (Å)         |
| N1 C2       | 1.300    | 1.318  | 1.318  | 1.307   | 1.304      | 1.304         | 1.296       |
| N1 C6       | 1.348    | 1.366  | 1.366  | 1.354   | 1.350      | 1.351         | 1.344       |
| N3 C2       | 1.339    | 1.359  | 1.359  | 1.345   | 1.340      | 1.340         | 1.333       |
| N3 C4       | 1.351    | 1.363  | 1.363  | 1.354   | 1.350      | 1.350         | 1.347       |
| C4 C5       | 1.379    | 1.403  | 1.404  | 1.390   | 1.380      | 1.381         | 1.369       |
| C5 C6       | 1.412    | 1.427  | 1.427  | 1.418   | 1.408      | 1.408         | 1.402       |
| N7 C8       | 1.325    | 1.348  | 1.349  | 1.335   | 1.328      | 1.330         | 1.319       |
| N7 C5       | 1.372    | 1.379  | 1.379  | 1.372   | 1.368      | 1.370         | 1.367       |
| N9 C8       | 1.327    | 1.347  | 1.348  | 1.334   | 1.328      | 1.330         | 1.321       |
| N9 C4       | 1.352    | 1.365  | 1.368  | 1.356   | 1.354      | 1.355         | 1.350       |
| N10 C6      | 1.321    | 1.342  | 1.343  | 1.329   | 1.326      | 1.325         | 1.318       |
| Pt1 N9      | 2.082    | 2.088  | 2.080  | 2.071   | 2.091      | 2.089         | 2.100       |
| Pt1 Cl5     | 2.309    | 2.258  | 2.262  | 2.264   | 2.246      | 2.248         | 2.292       |
| Pt1 Cl2     | 2.378    | 2.379  | 2.375  | 2.358   | 2.352      | 2.355         | 2.371       |
| Pt1 Cl1     | 2.400    | 2.404  | 2.406  | 2.383   | 2.378      | 2.378         | 2.398       |
| Pt1 Cl3     | 2.406    | 2.419  | 2.419  | 2.390   | 2.378      | 2.382         | 2.396       |
| Pt1 Cl4     | 2.377    | 2.387  | 2.385  | 2.361   | 2.353      | 2.358         | 2.370       |
| <b>RMSD</b> | 0.029    | 0.030  | 0.030  | 0.018   | 0.014      | 0.015         | 0.025       |

**Table S4a:** Geometrical parameters for PtKIN optimized using PBE0/def2-SV(P)-QZVPP *in vacuo*.

| Bond    | SV(P) | SVP   | TZVP  | TZVPP | QZVP  | QZVPP |
|---------|-------|-------|-------|-------|-------|-------|
| N1 C2   | 1.311 | 1.311 | 1.309 | 1.309 | 1.309 | 1.309 |
| N1 C6   | 1.347 | 1.347 | 1.346 | 1.346 | 1.345 | 1.345 |
| N3 C2   | 1.335 | 1.335 | 1.330 | 1.330 | 1.329 | 1.329 |
| N3 C4   | 1.348 | 1.347 | 1.343 | 1.343 | 1.342 | 1.342 |
| C4 C5   | 1.391 | 1.391 | 1.381 | 1.381 | 1.380 | 1.380 |
| C5 C6   | 1.418 | 1.417 | 1.408 | 1.408 | 1.407 | 1.407 |
| N7 C8   | 1.350 | 1.349 | 1.345 | 1.345 | 1.345 | 1.345 |
| N7 C5   | 1.384 | 1.382 | 1.380 | 1.380 | 1.378 | 1.378 |
| N9 C8   | 1.319 | 1.320 | 1.316 | 1.316 | 1.315 | 1.315 |
| N9 C4   | 1.347 | 1.347 | 1.346 | 1.346 | 1.346 | 1.346 |
| N10 C6  | 1.338 | 1.337 | 1.333 | 1.333 | 1.330 | 1.330 |
| Pt1 N9  | 2.103 | 2.081 | 2.075 | 2.072 | 2.066 | 2.065 |
| Pt1 Cl5 | 2.295 | 2.279 | 2.265 | 2.263 | 2.260 | 2.262 |
| Pt1 Cl2 | 2.352 | 2.328 | 2.321 | 2.319 | 2.316 | 2.317 |
| Pt1 Cl1 | 2.344 | 2.337 | 2.311 | 2.309 | 2.306 | 2.307 |
| Pt1 Cl3 | 2.374 | 2.381 | 2.340 | 2.338 | 2.336 | 2.335 |
| Pt1 Cl4 | 2.397 | 2.358 | 2.360 | 2.358 | 2.355 | 2.354 |
| RMSD    | 0.023 | 0.016 | 0.004 | 0.002 | 0.001 | -     |

**Table S4b:** Geometrical parameters for IrBAP optimized using PBE0/def2-SV(P)-QZVPP *in vacuo*.

| Bond    | SV(P) | SVP   | TZVP  | TZVPP | QZVP  | QZVPP |
|---------|-------|-------|-------|-------|-------|-------|
| N1 C2   | 1.313 | 1.314 | 1.312 | 1.312 | 1.312 | 1.312 |
| N1 C6   | 1.347 | 1.347 | 1.345 | 1.345 | 1.345 | 1.345 |
| N3 C2   | 1.333 | 1.333 | 1.328 | 1.328 | 1.327 | 1.327 |
| N3 C4   | 1.348 | 1.347 | 1.342 | 1.342 | 1.342 | 1.342 |
| C4 C5   | 1.391 | 1.391 | 1.382 | 1.382 | 1.380 | 1.380 |
| C5 C6   | 1.417 | 1.417 | 1.407 | 1.407 | 1.406 | 1.406 |
| N7 C8   | 1.353 | 1.353 | 1.349 | 1.349 | 1.348 | 1.348 |
| N7 C5   | 1.382 | 1.381 | 1.378 | 1.378 | 1.377 | 1.377 |
| N9 C8   | 1.320 | 1.321 | 1.316 | 1.316 | 1.315 | 1.315 |
| N9 C4   | 1.348 | 1.348 | 1.348 | 1.347 | 1.347 | 1.347 |
| N10 C6  | 1.340 | 1.339 | 1.333 | 1.333 | 1.333 | 1.333 |
| Ir1 N9  | 2.079 | 2.069 | 2.085 | 2.082 | 2.078 | 2.078 |
| Ir1 S1  | 2.278 | 2.262 | 2.234 | 2.232 | 2.225 | 2.225 |
| Ir1 Cl2 | 2.308 | 2.374 | 2.356 | 2.358 | 2.353 | 2.350 |
| Ir1 Cl1 | 2.387 | 2.368 | 2.359 | 2.355 | 2.350 | 2.353 |
| Ir1 Cl3 | 2.399 | 2.396 | 2.374 | 2.372 | 2.374 | 2.366 |
| Ir1 Cl4 | 2.409 | 2.386 | 2.381 | 2.378 | 2.366 | 2.374 |
| RMSD    | 0.022 | 0.015 | 0.004 | 0.003 | 0.003 | -     |

**Table S5a:** NMR shielding parameters for PtKIN calculated using ADF with PBE0/TZP.

| <sup>13</sup> C | BLYP  | PBE0  | PBE0_D3 | PBE0 TZVPP | PBE0 TZVPP D3 | X-ray |
|-----------------|-------|-------|---------|------------|---------------|-------|
| 2               | 32.1  | 36.4  | 36.4    | 37.4       | 37.1          | 37.0  |
| 4               | 36.5  | 41.8  | 41.5    | 43.0       | 42.6          | 41.0  |
| 5               | 66.5  | 70.5  | 70.3    | 72.4       | 72.3          | 73.1  |
| 6               | 25.4  | 29.9  | 29.8    | 30.7       | 30.8          | 30.2  |
| 8               | 33.5  | 38.8  | 38.6    | 39.9       | 39.6          | 37.8  |
| <sup>15</sup> N |       |       |         |            |               |       |
| 1               | -0.7  | 10.7  | 10.4    | 12.7       | 12.5          | 11.8  |
| 3               | 86.7  | 92.5  | 92.3    | 95.6       | 95.5          | 91.5  |
| 7               | 82.9  | 90.0  | 89.6    | 92.2       | 91.7          | 95.2  |
| 9               | 89.4  | 92.5  | 92.0    | 93.4       | 93.1          | 85.1  |
| 10              | 128.7 | 134.4 | 134.0   | 136.1      | 135.9         | 133.4 |

**Table S5b:** NMR shielding parameters for PtKIN calculated using ADF with PBE0/TZP.

| <sup>13</sup> C | BLYP  | PBE0  | PBE0_D3 | PBE0 TZVPP | PBE0 TZVPP D3 | X-ray |
|-----------------|-------|-------|---------|------------|---------------|-------|
| 2               | 33.8  | 38.9  | 39.1    | 39.9       | 40.0          | 39.3  |
| 4               | 33.4  | 38.4  | 38.0    | 39.8       | 39.5          | 37.3  |
| 5               | 65.8  | 69.8  | 69.7    | 71.4       | 71.4          | 73.8  |
| 6               | 25.8  | 31.0  | 31.1    | 31.6       | 31.6          | 36.4  |
| 8               | 32.3  | 37.6  | 37.4    | 38.5       | 38.4          | 35.4  |
| <sup>15</sup> N |       |       |         |            |               |       |
| 1               | 0.3   | 11.1  | 10.3    | 12.3       | 11.6          | 14.5  |
| 3               | 82.6  | 88.3  | 87.9    | 92.1       | 91.4          | 87.4  |
| 7               | 86.1  | 93.3  | 92.8    | 95.3       | 94.9          | 98.4  |
| 9               | 91.0  | 91.1  | 90.7    | 88.9       | 88.7          | 85.9  |
| 10              | 124.7 | 130.5 | 130.3   | 132.6      | 132.4         | 131.7 |

**Table S6:** Calculated NMR chemical shifts (PBE0/TZP/COSMO) for PBE0/def2-TZVPP/COSMO optimized geometries.

| IrBAP       |              |            | PtKIN       |              |            |
|-------------|--------------|------------|-------------|--------------|------------|
| Atom        | Experimental | Calculated | Atom        | Experimental | Calculated |
| H2          | 8.8          | 8.2        | H2          | 8.8          | 7.2        |
| H8          | 9.0          | 9.0        | H8          | 8.6          | 8.1        |
| H10         | 10.6         | 6.1        | H10         | 9.8          | 7.9        |
| H11         | 4.9          | 4.8        | H11         | 5.0          | 5.0        |
| H13.17      | 7.4          | 7.4        | H13         | 6.4          | 7.0        |
| H14.16      | 7.4          | 7.2        | H14         | 6.5          | 6.5        |
| H15         | 7.3          | 7.2        | H15         | 7.7          | 7.7        |
| H18.19      | 3.4          | 2.9        |             |              |            |
| <b>RMSD</b> |              | <b>1.4</b> | <b>RMSD</b> |              | <b>1.2</b> |
| C2          | 146.9        | 142.9      | C2          | 146.0        | 142.2      |
| C4          | 144.5        | 143.9      | C4          | 143.8        | 140.1      |
| C5          | 111.0        | 111.0      | C5          | 117.9        | 117.6      |
| C6          | 152.6        | 149.6      | C6          | 155.0        | 151.0      |
| C8          | 147.1        | 144.8      | C8          | 148.5        | 146.1      |
| C11         | 44.3         | 39.1       | C11         | 38.5         | 31.0       |
| C12         | 136.4        | 138.3      | C12         | 151.6        | 152.8      |
| C13.17      | 127.6        | 128.3      | C13         | 108.7        | 111.9      |
| C14.16      | 128.5        | 128.9      | C14         | 111.2        | 112.7      |
| C15         | 127.5        | 127.8      | C15         | 143.4        | 146.0      |
| C18.19      | 40.8         | 35.8       |             |              |            |
| <b>RMSD</b> |              | <b>2.9</b> | <b>RMSD</b> |              | <b>3.7</b> |
| N1          | 227.6        | 233.5      | N1          | 226.6        | 231.1      |
| N3          | 154.2        | 159.0      | N3          | 153.8        | 156.5      |
| N7          | 162.7        | 162.7      | N7          | 211.2        | 211.2      |
| N9          | 150.9        | 163.9      | N9          | 139.8        | 156.1      |
| N10         | 118.7        | 122.7      | N10         | 105.5        | 107.0      |
| <b>RMSD</b> |              | <b>7.0</b> | <b>RMSD</b> |              | <b>7.7</b> |

**Table S7:** Interatomic distances for BHLYP, PBE0, and MP2 optimized structures of PtKIN and IrBAP.

| Bond                 | PtKIN    |              |              | Bond    | IrBAP    |              |              |
|----------------------|----------|--------------|--------------|---------|----------|--------------|--------------|
|                      | PBE0     | BHLYP        | MP2          |         | PBE0     | BHLYP        | MP2          |
| N1 C2                | 1,301    | 1,295        | 1,313        | N1 C2   | 1,304    | 1,295        | 1,316        |
| N1 C6                | 1,351    | 1,345        | 1,358        | N1 C6   | 1,351    | 1,346        | 1,359        |
| N3 C2                | 1,339    | 1,332        | 1,341        | N3 C2   | 1,336    | 1,330        | 1,341        |
| N3 C4                | 1,348    | 1,345        | 1,356        | N3 C4   | 1,349    | 1,346        | 1,357        |
| C4 C5                | 1,377    | 1,366        | 1,383        | C4 C5   | 1,379    | 1,367        | 1,385        |
| C5 C6                | 1,414    | 1,408        | 1,420        | C5 C6   | 1,413    | 1,407        | 1,420        |
| N7 C8                | 1,328    | 1,318        | 1,340        | N7 C8   | 1,333    | 1,323        | 1,345        |
| N7 C5                | 1,371    | 1,370        | 1,372        | N7 C5   | 1,371    | 1,370        | 1,371        |
| N9 C8                | 1,329    | 1,322        | 1,336        | N9 C8   | 1,327    | 1,320        | 1,336        |
| N9 C4                | 1,355    | 1,353        | 1,364        | N9 C4   | 1,353    | 1,349        | 1,363        |
| N10 C6               | 1,319    | 1,311        | 1,320        | N10 C6  | 1,321    | 1,313        | 1,323        |
| Pt1 N9               | 2,056    | 2,071        | 2,045        | Ir1 N9  | 2,095    | 2,106        | 2,088        |
| Pt1 Cl5              | 2,291    | 2,299        | 2,279        | Ir1 S1  | 2,244    | 2,294        | 2,208        |
| Pt1 Cl2              | 2,321    | 2,330        | 2,311        | Ir1 Cl2 | 2,358    | 2,377        | 2,338        |
| Pt1 Cl1              | 2,319    | 2,330        | 2,308        | Ir1 Cl1 | 2,361    | 2,381        | 2,340        |
| Pt1 Cl3              | 2,331    | 2,340        | 2,319        | Ir1 Cl3 | 2,367    | 2,386        | 2,353        |
| Pt1 Cl4              | 2,335    | 2,340        | 2,324        | Ir1 Cl4 | 2,365    | 2,381        | 2,339        |
| <b>RMSD vs. PBE0</b> | <b>-</b> | <b>0,009</b> | <b>0,008</b> |         | <b>-</b> | <b>0,016</b> | <b>0,015</b> |

## Cartesian coordinates

PtBAP cluster PBE0/def2-TZVPP optimized geometry:

|    |           |           |           |
|----|-----------|-----------|-----------|
| Pt | -0.171756 | -1.879509 | 8.303174  |
| Cl | -0.118553 | 0.298740  | 7.447791  |
| Cl | -0.735232 | -2.731003 | 6.253915  |
| Cl | -2.441538 | -1.682659 | 8.812275  |
| Cl | -0.151766 | -4.026487 | 9.173960  |
| Cl | 2.080897  | -2.113288 | 7.825866  |
| N  | 0.347882  | -1.150002 | 10.148103 |
| N  | 1.554689  | -0.095336 | 11.648822 |
| H  | 2.316986  | 0.455876  | 12.074293 |
| N  | -0.630091 | -1.922584 | 14.000383 |
| N  | -1.108769 | -2.315730 | 11.741820 |
| H  | -1.689766 | -2.816701 | 11.069271 |
| N  | 1.062726  | -0.507119 | 14.681695 |
| H  | 1.856833  | 0.072325  | 14.413310 |
| C  | 1.357726  | -0.305593 | 10.355636 |
| H  | 1.967522  | 0.143794  | 9.589471  |
| C  | 0.632530  | -0.836941 | 12.336531 |
| C  | 0.369268  | -1.071045 | 13.701172 |
| C  | -1.325052 | -2.484661 | 13.049563 |
| H  | -2.131576 | -3.166551 | 13.301368 |
| C  | -0.116556 | -1.484255 | 11.376973 |
| C  | 0.922211  | -0.896044 | 16.069319 |
| H  | 1.924461  | -0.922963 | 16.503455 |
| H  | 0.534591  | -1.914824 | 16.093703 |
| C  | 0.024674  | -0.039337 | 16.925386 |
| C  | -0.983416 | 0.752235  | 16.391403 |
| H  | -1.132001 | 0.821438  | 15.320193 |
| C  | -1.830402 | 1.460318  | 17.233195 |
| H  | -2.604967 | 2.076069  | 16.795964 |
| C  | -1.691169 | 1.369931  | 18.608949 |
| H  | -2.368722 | 1.906497  | 19.262972 |
| C  | -0.684706 | 0.580990  | 19.150217 |
| H  | -0.539324 | 0.523650  | 20.222411 |
| C  | 0.168151  | -0.115113 | 18.308960 |
| H  | 0.951875  | -0.720942 | 18.752622 |
| O  | -1.413949 | -3.209122 | 17.290188 |
| N  | -3.261582 | -1.883320 | 17.523388 |
| C  | -2.276635 | -2.411744 | 16.828411 |
| H  | -2.195425 | -2.175070 | 15.932804 |
| C  | -4.135884 | -0.919196 | 16.926560 |
| H  | -3.820575 | -0.692522 | 16.049356 |
| H  | -4.155340 | -0.130838 | 17.472512 |
| H  | -5.021225 | -1.286708 | 16.863172 |
| C  | -3.501876 | -2.210904 | 18.901802 |
| H  | -2.791723 | -2.765922 | 19.233053 |
| H  | -4.337338 | -2.678419 | 18.977458 |
| H  | -3.540610 | -1.400045 | 19.412994 |
| O  | -1.513598 | -2.445078 | 21.299904 |
| N  | -1.453461 | -2.115068 | 23.498434 |
| C  | -1.149391 | -1.797558 | 22.273621 |

|    |           |            |           |
|----|-----------|------------|-----------|
| H  | -0.628191 | -1.040033  | 22.130487 |
| C  | -0.836961 | -1.395878  | 24.604652 |
| H  | -0.222531 | -1.975063  | 25.060634 |
| H  | -1.519040 | -1.106702  | 25.216036 |
| H  | -0.365623 | -0.630854  | 24.265221 |
| C  | -2.239442 | -3.302606  | 23.780612 |
| H  | -2.790242 | -3.510112  | 23.022004 |
| H  | -2.794494 | -3.143434  | 24.547398 |
| H  | -1.650644 | -4.040129  | 23.958506 |
| Pt | -3.608303 | -6.375062  | 12.124881 |
| Cl | -3.635343 | -8.514942  | 13.008178 |
| Cl | -3.040569 | -5.490509  | 14.168786 |
| Cl | -1.361030 | -6.589131  | 11.584205 |
| Cl | -3.631160 | -4.234135  | 11.212875 |
| Cl | -5.858081 | -6.156947  | 12.623558 |
| N  | -4.141636 | -7.150232  | 10.302751 |
| N  | -5.357311 | -8.234433  | 8.821524  |
| H  | -5.952038 | -8.756950  | 8.487818  |
| N  | -3.215516 | -6.391038  | 6.406246  |
| N  | -2.710149 | -5.979358  | 8.675732  |
| H  | -2.228919 | -5.566011  | 9.254605  |
| N  | -4.934832 | -7.797753  | 5.765417  |
| H  | -5.503100 | -8.407772  | 5.974800  |
| C  | -5.148038 | -8.014426  | 10.117086 |
| H  | -5.636577 | -8.408605  | 10.802491 |
| C  | -4.449494 | -7.477742  | 8.110355  |
| C  | -4.216932 | -7.246068  | 6.732593  |
| C  | -2.517240 | -5.821020  | 7.356859  |
| H  | -1.827365 | -5.255168  | 7.095334  |
| C  | -3.698644 | -6.821888  | 9.046652  |
| C  | -4.806645 | -7.417740  | 4.363117  |
| H  | -5.683634 | -7.461908  | 3.952529  |
| H  | -4.513227 | -6.493542  | 4.322631  |
| C  | -3.855376 | -8.253600  | 3.539895  |
| C  | -2.882556 | -9.067793  | 4.086461  |
| H  | -2.802852 | -9.128628  | 5.011717  |
| C  | -2.025878 | -9.796983  | 3.275712  |
| H  | -1.381548 | -10.348667 | 3.660128  |
| C  | -2.122655 | -9.706980  | 1.911854  |
| H  | -1.549141 | -10.200329 | 1.372037  |
| C  | -3.069109 | -8.885287  | 1.345455  |
| H  | -3.125931 | -8.812785  | 0.419177  |
| C  | -3.934406 | -8.171098  | 2.145571  |
| H  | -4.578999 | -7.626914  | 1.754408  |
| O  | 3.395144  | 1.721722   | 9.371565  |
| N  | 3.335007  | 2.051732   | 7.173035  |
| C  | 3.030937  | 2.369242   | 8.397849  |
| H  | 2.509737  | 3.126767   | 8.540982  |
| C  | 2.718507  | 2.770922   | 6.066815  |
| H  | 2.104076  | 2.191737   | 5.610832  |
| H  | 3.400585  | 3.060098   | 5.455430  |
| H  | 2.247168  | 3.535946   | 6.406246  |
| C  | 4.120988  | 0.864194   | 6.890858  |
| H  | 4.671788  | 0.656688   | 7.649465  |
| H  | 4.676040  | 1.023366   | 6.124068  |



|    |           |           |           |
|----|-----------|-----------|-----------|
| H  | 3.532189  | 0.126671  | 6.712963  |
| O  | 3.306517  | 0.937530  | 13.352926 |
| N  | 5.136109  | 2.274239  | 13.153561 |
| C  | 4.158180  | 1.755056  | 13.843055 |
| H  | 4.076970  | 1.991730  | 14.738662 |
| C  | 6.017429  | 3.247604  | 13.744907 |
| H  | 5.702121  | 3.474278  | 14.622111 |
| H  | 6.036886  | 4.035962  | 13.198955 |
| H  | 6.902773  | 2.880092  | 13.808294 |
| C  | 5.383422  | 1.955896  | 11.769665 |
| H  | 4.673269  | 1.400878  | 11.438413 |
| H  | 6.218884  | 1.488381  | 11.694008 |
| H  | 5.422156  | 2.766755  | 11.258474 |
| Pt | -3.608303 | 1.958538  | 12.124881 |
| Cl | -3.635343 | -0.181339 | 13.008178 |
| Cl | -3.040569 | 2.843091  | 14.168786 |
| Cl | -1.361030 | 1.744472  | 11.584205 |
| Cl | -3.631160 | 4.099465  | 11.212875 |
| Cl | -5.858081 | 2.176653  | 12.623558 |
| N  | -4.141636 | 1.183371  | 10.302751 |
| N  | -5.357311 | 0.099170  | 8.821524  |
| H  | -5.952038 | -0.423347 | 8.487818  |
| N  | -3.215516 | 1.942562  | 6.406246  |
| N  | -2.710149 | 2.354242  | 8.675732  |
| H  | -2.228919 | 2.767589  | 9.254605  |
| N  | -4.934832 | 0.535850  | 5.765417  |
| H  | -5.503100 | -0.074169 | 5.974800  |
| C  | -5.148038 | 0.319177  | 10.117086 |
| H  | -5.636577 | -0.075002 | 10.802491 |
| C  | -4.449494 | 0.855861  | 8.110355  |
| C  | -4.216932 | 1.087535  | 6.732593  |
| C  | -2.517240 | 2.512580  | 7.356859  |
| H  | -1.827365 | 3.078432  | 7.095334  |
| C  | -3.698644 | 1.511715  | 9.046652  |
| C  | -4.806645 | 0.915863  | 4.363117  |
| H  | -5.683634 | 0.871695  | 3.952529  |
| H  | -4.513227 | 1.840059  | 4.322631  |
| C  | -3.855376 | 0.080003  | 3.539895  |
| C  | -2.882556 | -0.734190 | 4.086461  |
| H  | -2.802852 | -0.795025 | 5.011717  |
| C  | -2.025878 | -1.463380 | 3.275712  |
| H  | -1.381548 | -2.015064 | 3.660128  |
| C  | -2.122655 | -1.373377 | 1.911854  |
| H  | -1.549141 | -1.866726 | 1.372037  |
| C  | -3.069109 | -0.551684 | 1.345455  |
| H  | -3.125931 | -0.479182 | 0.419177  |
| C  | -3.934406 | 0.162505  | 2.145571  |
| H  | -4.578999 | 0.706689  | 1.754408  |
| O  | 8.033117  | -0.937530 | 7.094721  |
| N  | 6.203522  | -2.274239 | 7.294085  |
| C  | 7.181453  | -1.755056 | 6.604591  |
| H  | 7.262663  | -1.991730 | 5.708981  |
| C  | 5.322201  | -3.247604 | 6.702739  |
| H  | 5.637510  | -3.474278 | 5.825533  |
| H  | 5.302745  | -4.035962 | 7.248691  |

|    |           |           |           |
|----|-----------|-----------|-----------|
| H  | 4.436860  | -2.880092 | 6.639352  |
| C  | 5.956208  | -1.955896 | 8.677982  |
| H  | 6.666364  | -1.400878 | 9.009233  |
| H  | 5.120747  | -1.488381 | 8.753638  |
| H  | 5.917475  | -2.766755 | 9.189173  |
| O  | 2.274671  | -2.445078 | 0.852258  |
| N  | 2.334809  | -2.115068 | 3.050788  |
| C  | 2.638878  | -1.797558 | 1.825974  |
| H  | 3.160078  | -1.040033 | 1.682841  |
| C  | 2.951308  | -1.395878 | 4.157005  |
| H  | 3.565739  | -1.975063 | 4.612988  |
| H  | 2.269230  | -1.106702 | 4.768390  |
| H  | 3.422647  | -0.630854 | 3.817574  |
| C  | 1.548827  | -3.302606 | 3.332965  |
| H  | 0.998027  | -3.510112 | 2.574358  |
| H  | 0.993776  | -3.143434 | 4.099752  |
| H  | 2.137626  | -4.040129 | 3.510860  |
| Pt | 2.061513  | -6.125338 | 22.348704 |
| Cl | 2.034472  | -3.985461 | 23.232001 |
| Cl | 2.629246  | -7.009894 | 24.392610 |
| Cl | 4.308785  | -5.911272 | 21.808028 |
| Cl | 2.038655  | -8.266268 | 21.436699 |
| Cl | -0.188266 | -6.343453 | 22.847381 |
| N  | 1.528180  | -5.350171 | 20.526574 |
| N  | 0.312504  | -4.265970 | 19.045344 |
| H  | -0.282223 | -3.743453 | 18.711639 |
| N  | 2.454299  | -6.109362 | 16.630069 |
| N  | 2.959666  | -6.521045 | 18.899552 |
| H  | 3.440896  | -6.934392 | 19.478426 |
| N  | 0.734983  | -4.702650 | 15.989240 |
| H  | 0.166715  | -4.092631 | 16.198624 |
| C  | 0.521778  | -4.485977 | 20.340910 |
| H  | 0.033238  | -4.091798 | 21.026314 |
| C  | 1.220321  | -5.022661 | 18.334175 |
| C  | 1.452883  | -5.254335 | 16.956413 |
| C  | 3.152575  | -6.679383 | 17.580680 |
| H  | 3.842450  | -7.245235 | 17.319154 |
| C  | 1.971171  | -5.678515 | 19.270473 |
| C  | 0.863170  | -5.082663 | 14.586941 |
| H  | -0.013819 | -5.038495 | 14.176352 |
| H  | 1.156588  | -6.006859 | 14.546454 |
| C  | 1.814439  | -4.246803 | 13.763719 |
| C  | 2.787260  | -3.432610 | 14.310284 |
| H  | 2.866964  | -3.371775 | 15.235540 |
| C  | 3.643937  | -2.703420 | 13.499535 |
| H  | 4.288268  | -2.151736 | 13.883951 |
| C  | 3.547160  | -2.793423 | 12.135678 |
| H  | 4.120674  | -2.300074 | 11.595860 |
| C  | 2.600707  | -3.615116 | 11.569278 |
| H  | 2.543884  | -3.687618 | 10.643000 |
| C  | 1.735409  | -4.329305 | 12.369394 |
| H  | 1.090816  | -4.873489 | 11.978231 |
| Pt | 2.061513  | 2.208262  | 22.348704 |
| Cl | 2.034472  | 4.348139  | 23.232001 |
| Cl | 2.629246  | 1.323709  | 24.392610 |

|    |           |          |           |
|----|-----------|----------|-----------|
| Cl | 4.308785  | 2.422328 | 21.808028 |
| Cl | 2.038655  | 0.067335 | 21.436699 |
| Cl | -0.188266 | 1.990147 | 22.847381 |
| N  | 1.528180  | 2.983429 | 20.526574 |
| N  | 0.312504  | 4.067630 | 19.045344 |
| H  | -0.282223 | 4.590147 | 18.711639 |
| N  | 2.454299  | 2.224238 | 16.630069 |
| N  | 2.959666  | 1.812558 | 18.899552 |
| H  | 3.440896  | 1.399211 | 19.478426 |
| N  | 0.734983  | 3.630950 | 15.989240 |
| H  | 0.166715  | 4.240969 | 16.198624 |
| C  | 0.521778  | 3.847623 | 20.340910 |
| H  | 0.033238  | 4.241802 | 21.026314 |
| C  | 1.220321  | 3.310939 | 18.334175 |
| C  | 1.452883  | 3.079265 | 16.956413 |
| C  | 3.152575  | 1.654220 | 17.580680 |
| H  | 3.842450  | 1.088368 | 17.319154 |
| C  | 1.971171  | 2.655085 | 19.270473 |
| C  | 0.863170  | 3.250937 | 14.586941 |
| H  | -0.013819 | 3.295105 | 14.176352 |
| H  | 1.156588  | 2.326741 | 14.546454 |
| C  | 1.814439  | 4.086797 | 13.763719 |
| C  | 2.787260  | 4.900990 | 14.310284 |
| H  | 2.866964  | 4.961825 | 15.235540 |
| C  | 3.643937  | 5.630180 | 13.499535 |
| H  | 4.288268  | 6.181864 | 13.883951 |
| C  | 3.547160  | 5.540177 | 12.135678 |
| H  | 4.120674  | 6.033526 | 11.595860 |
| C  | 2.600707  | 4.718484 | 11.569278 |
| H  | 2.543884  | 4.645982 | 10.643000 |
| C  | 1.735409  | 4.004295 | 12.369394 |
| H  | 1.090816  | 3.460111 | 11.978231 |
| O  | -1.424971 | 5.104330 | 17.318541 |
| N  | -3.254563 | 6.441039 | 17.517905 |
| C  | -2.276635 | 5.921856 | 16.828411 |
| H  | -2.195425 | 6.158530 | 15.932804 |
| C  | -4.135884 | 7.414407 | 16.926560 |
| H  | -3.820575 | 7.641081 | 16.049356 |
| H  | -4.155340 | 8.202765 | 17.472512 |
| H  | -5.021225 | 7.046895 | 16.863172 |
| C  | -3.501876 | 6.122696 | 18.901802 |
| H  | -2.791723 | 5.567678 | 19.233053 |
| H  | -4.337338 | 5.655181 | 18.977458 |
| H  | -3.540610 | 6.933558 | 19.412994 |
| O  | -6.062941 | 2.445078 | 19.595389 |
| N  | -6.123078 | 2.115068 | 17.396855 |
| C  | -6.427148 | 1.797558 | 18.621669 |
| H  | -6.948351 | 1.040033 | 18.764802 |
| C  | -6.739581 | 1.395878 | 16.290638 |
| H  | -7.354011 | 1.975063 | 15.834656 |
| H  | -6.057499 | 1.106702 | 15.679254 |
| H  | -7.210919 | 0.630854 | 16.630069 |
| C  | -5.337097 | 3.302606 | 17.114678 |
| H  | -4.786297 | 3.510112 | 17.873285 |
| H  | -4.782045 | 3.143434 | 16.347891 |

|    |           |            |           |
|----|-----------|------------|-----------|
| H  | -5.925896 | 4.040129   | 16.936783 |
| O  | -6.151568 | 3.229270   | 23.576749 |
| N  | -4.321976 | 1.892561   | 23.377384 |
| C  | -5.299905 | 2.411744   | 24.066879 |
| H  | -5.381115 | 2.175070   | 24.962485 |
| C  | -3.440655 | 0.919196   | 23.968730 |
| H  | -3.755964 | 0.692522   | 24.845934 |
| H  | -3.421199 | 0.130838   | 23.422778 |
| H  | -2.555315 | 1.286708   | 24.032118 |
| C  | -4.074663 | 2.210904   | 21.993488 |
| H  | -4.784816 | 2.765922   | 21.662236 |
| H  | -3.239201 | 2.678419   | 21.917832 |
| H  | -4.035929 | 1.400045   | 21.482297 |
| O  | -2.363298 | 3.229270   | 3.129102  |
| N  | -0.533707 | 1.892561   | 2.929738  |
| C  | -1.511635 | 2.411744   | 3.619232  |
| H  | -1.592845 | 2.175070   | 4.514839  |
| C  | 0.347614  | 0.919196   | 3.521084  |
| H  | 0.032306  | 0.692522   | 4.398287  |
| H  | 0.367070  | 0.130838   | 2.975132  |
| H  | 1.232955  | 1.286708   | 3.584471  |
| C  | -0.286393 | 2.210904   | 1.545842  |
| H  | -0.996546 | 2.765922   | 1.214590  |
| H  | 0.549068  | 2.678419   | 1.470185  |
| H  | -0.247660 | 1.400045   | 1.034651  |
| Pt | -0.179967 | -10.292141 | 8.322765  |
| Cl | -0.152926 | -8.152264  | 7.439468  |
| Cl | -0.747701 | -11.176694 | 6.278857  |
| Cl | -2.427239 | -10.078075 | 8.863442  |
| Cl | -0.157110 | -12.433068 | 9.234771  |
| Cl | 2.069811  | -10.510256 | 7.824088  |
| N  | 0.353366  | -9.516974  | 10.144895 |
| N  | 1.569042  | -8.432773  | 11.626122 |
| H  | 2.163768  | -7.910256  | 11.959828 |
| N  | -0.572753 | -10.276165 | 14.041398 |
| N  | -1.078121 | -10.687845 | 11.771914 |
| H  | -1.559350 | -11.101192 | 11.193041 |
| N  | 1.146562  | -8.869453  | 14.682227 |
| H  | 1.714831  | -8.259434  | 14.472843 |
| C  | 1.359768  | -8.652780  | 10.330560 |
| H  | 1.848308  | -8.258601  | 9.645155  |
| C  | 0.661225  | -9.189464  | 12.337291 |
| C  | 0.428663  | -9.421138  | 13.715053 |
| C  | -1.271029 | -10.846183 | 13.090787 |
| H  | -1.960904 | -11.412035 | 13.352312 |
| C  | -0.089625 | -9.845318  | 11.400994 |
| C  | 1.018375  | -9.249466  | 16.084526 |
| H  | 1.895365  | -9.205298  | 16.495114 |
| H  | 0.724957  | -10.173662 | 16.125012 |
| C  | 0.067106  | -8.413606  | 16.907748 |
| C  | -0.905714 | -7.599413  | 16.361182 |
| H  | -0.985418 | -7.538578  | 15.435927 |
| C  | -1.762392 | -6.870223  | 17.171931 |
| H  | -2.406722 | -6.318536  | 16.787516 |
| C  | -1.665615 | -6.960226  | 18.535789 |

|   |           |           |           |
|---|-----------|-----------|-----------|
| H | -2.239128 | -6.466875 | 19.075607 |
| C | -0.719161 | -7.781919 | 19.102189 |
| H | -0.662338 | -7.854421 | 20.028470 |
| C | 0.146137  | -8.496108 | 18.302072 |
| H | 0.790729  | -9.040292 | 18.693236 |

IrC3P cluster PBE0/def2-TZVPP optimized geometry:

|    |           |           |          |
|----|-----------|-----------|----------|
| C  | 4.225839  | 7.491203  | 6.399716 |
| H  | 4.395713  | 8.563954  | 6.433590 |
| C  | 2.908043  | 5.790313  | 5.572375 |
| C  | 3.715965  | 4.882160  | 6.226786 |
| C  | 4.814321  | 5.342549  | 6.978392 |
| C  | 2.153181  | 3.851136  | 5.125386 |
| H  | 1.552623  | 3.052448  | 4.737089 |
| C  | 6.928756  | 5.003454  | 8.138043 |
| H  | 6.809917  | 5.462837  | 9.123550 |
| H  | 7.303429  | 5.768151  | 7.453401 |
| C  | 7.907587  | 3.851196  | 8.228189 |
| H  | 7.520629  | 3.086842  | 8.911295 |
| H  | 7.989705  | 3.400639  | 7.233506 |
| C  | 9.263262  | 4.333201  | 8.715463 |
| H  | 9.654893  | 5.102822  | 8.045326 |
| H  | 9.983021  | 3.511310  | 8.760397 |
| H  | 9.188129  | 4.771110  | 9.713021 |
| C  | -2.534874 | 7.002309  | 2.917314 |
| H  | -2.354025 | 7.727797  | 3.707678 |
| H  | -2.869151 | 6.055831  | 3.332762 |
| H  | -3.244823 | 7.369827  | 2.180010 |
| C  | -1.445325 | 5.669696  | 0.810982 |
| H  | -2.153721 | 6.199644  | 0.174080 |
| H  | -1.893984 | 4.790564  | 1.271795 |
| H  | -0.567097 | 5.378630  | 0.235031 |
| Cl | 0.061048  | 7.640493  | 5.070728 |
| Cl | 2.245870  | 7.135763  | 2.594501 |
| Cl | 1.063124  | 4.063754  | 2.147206 |
| Cl | -1.120078 | 4.469933  | 4.571353 |
| Ir | 0.507474  | 5.869172  | 3.547719 |
| N  | 5.013879  | 6.676293  | 7.044671 |
| N  | 3.166602  | 7.111206  | 5.672251 |
| H  | 2.550407  | 7.782832  | 5.220920 |
| N  | 5.644879  | 4.539317  | 7.628323 |
| H  | 5.513078  | 3.542044  | 7.505607 |
| N  | 3.200488  | 3.653578  | 5.918483 |
| H  | 3.558320  | 2.736983  | 6.218260 |
| N  | 1.937856  | 5.139981  | 4.886882 |
| O  | -0.605376 | 8.063995  | 1.530798 |
| S  | -0.977121 | 6.758861  | 2.116849 |
| C  | -0.241010 | 0.887128  | 2.000012 |
| H  | -0.451033 | 1.787302  | 1.899070 |
| C  | 1.104132  | -0.757973 | 2.940993 |
| C  | 0.353921  | -1.685543 | 2.284017 |
| C  | -0.732163 | -1.307209 | 1.491882 |
| C  | 1.938509  | -2.636597 | 3.452544 |
| H  | 2.480325  | -3.295420 | 3.823804 |

|    |            |           |           |
|----|------------|-----------|-----------|
| C  | -2.774387  | -1.796434 | 0.222414  |
| H  | -2.625687  | -1.660756 | -0.725411 |
| H  | -3.108610  | -0.966709 | 0.597095  |
| C  | -3.811407  | -2.909258 | 0.427719  |
| H  | -3.530305  | -3.711587 | -0.039350 |
| H  | -3.887376  | -3.119299 | 1.372121  |
| C  | -5.127933  | -2.457866 | -0.095809 |
| H  | -5.314244  | -1.573348 | 0.225835  |
| H  | -5.815189  | -3.057982 | 0.205305  |
| H  | -5.105900  | -2.452648 | -1.055609 |
| C  | 6.495279   | 0.834944  | 5.348192  |
| H  | 6.272163   | 1.553779  | 4.752808  |
| H  | 6.800897   | 0.080885  | 4.840063  |
| H  | 7.189920   | 1.120651  | 5.946998  |
| C  | 5.751694   | -0.726662 | 7.461125  |
| H  | 6.399750   | -0.262225 | 7.994918  |
| H  | 6.176623   | -1.457238 | 7.006032  |
| H  | 5.053006   | -1.064554 | 8.027424  |
| Cl | 3.843483   | 1.181968  | 3.414734  |
| Cl | 1.769430   | 0.695221  | 5.969240  |
| Cl | 3.048200   | -2.315665 | 6.462314  |
| Cl | 5.129120   | -1.907325 | 3.965293  |
| Ir | 3.509070   | -0.546236 | 4.973819  |
| N  | -0.978144  | 0.011741  | 1.380675  |
| N  | 0.811569   | 0.562283  | 2.783592  |
| H  | 1.280654   | 1.170226  | 3.170250  |
| N  | -1.510157  | -2.157808 | 0.874257  |
| H  | -1.265816  | -2.982316 | 0.848594  |
| N  | 0.921886   | -2.900126 | 2.633035  |
| H  | 0.665277   | -3.677667 | 2.371271  |
| N  | 2.100323   | -1.343738 | 3.685223  |
| O  | 4.659083   | 1.586394  | 7.006032  |
| S  | 5.065371   | 0.377551  | 6.280277  |
| C  | -3.844715  | 7.410131  | 6.554362  |
| H  | -3.634692  | 8.310305  | 6.655303  |
| C  | -5.189857  | 5.765027  | 5.613378  |
| C  | -4.439646  | 4.837457  | 6.270353  |
| C  | -3.353562  | 5.215791  | 7.062491  |
| C  | -6.024234  | 3.886403  | 5.101826  |
| H  | -6.566053  | 3.227580  | 4.730567  |
| C  | -1.311338  | 4.726566  | 8.331960  |
| H  | -1.460038  | 4.862244  | 9.279784  |
| H  | -0.977115  | 5.556291  | 7.957278  |
| C  | -0.274318  | 3.613742  | 8.126655  |
| H  | -0.555420  | 2.811413  | 8.593723  |
| H  | -0.198349  | 3.403701  | 7.182252  |
| C  | 1.042208   | 4.065134  | 8.650182  |
| H  | 1.228520   | 4.949652  | 8.328538  |
| H  | 1.729464   | 3.465018  | 8.349068  |
| H  | 1.020175   | 4.070352  | 9.609983  |
| C  | -10.581005 | 7.357947  | 3.206178  |
| H  | -10.357891 | 8.076782  | 3.801562  |
| H  | -10.886622 | 6.603888  | 3.714308  |
| H  | -11.275645 | 7.643654  | 2.607372  |
| C  | -9.837421  | 5.796338  | 1.093249  |

|    |            |          |          |
|----|------------|----------|----------|
| H  | -10.485478 | 6.260775 | 0.559456 |
| H  | -10.262351 | 5.065762 | 1.548341 |
| H  | -9.138734  | 5.458446 | 0.526949 |
| Cl | -7.929211  | 7.704971 | 5.139637 |
| Cl | -5.855155  | 7.218224 | 2.585131 |
| Cl | -7.133928  | 4.207335 | 2.092057 |
| Cl | -9.214848  | 4.615675 | 4.589078 |
| Ir | -7.594798  | 5.976764 | 3.580551 |
| N  | -3.107581  | 6.534744 | 7.173698 |
| N  | -4.897294  | 7.085286 | 5.770778 |
| H  | -5.366379  | 7.693229 | 5.384121 |
| N  | -2.575567  | 4.365192 | 7.680117 |
| H  | -2.819909  | 3.540684 | 7.705780 |
| N  | -5.007611  | 3.622874 | 5.921335 |
| H  | -4.751002  | 2.845333 | 6.183099 |
| N  | -6.186047  | 5.179262 | 4.869148 |
| O  | -8.744810  | 8.109397 | 1.548341 |
| S  | -9.151099  | 6.900554 | 2.274094 |
| C  | 12.499288  | 7.410131 | 6.554362 |
| H  | 12.709311  | 8.310305 | 6.655303 |
| C  | 11.154146  | 5.765027 | 5.613378 |
| C  | 11.904357  | 4.837457 | 6.270353 |
| C  | 12.990441  | 5.215791 | 7.062491 |
| C  | 10.319769  | 3.886403 | 5.101826 |
| H  | 9.777953   | 3.227580 | 4.730567 |
| C  | 15.032665  | 4.726566 | 8.331960 |
| H  | 14.883965  | 4.862244 | 9.279784 |
| H  | 15.366888  | 5.556291 | 7.957278 |
| C  | 16.069685  | 3.613742 | 8.126655 |
| H  | 15.788583  | 2.811413 | 8.593723 |
| H  | 16.145654  | 3.403701 | 7.182252 |
| C  | 17.386211  | 4.065134 | 8.650182 |
| H  | 17.572523  | 4.949652 | 8.328538 |
| H  | 18.073467  | 3.465018 | 8.349068 |
| H  | 17.364178  | 4.070352 | 9.609983 |
| C  | 5.762998   | 7.357947 | 3.206178 |
| H  | 5.986112   | 8.076782 | 3.801562 |
| H  | 5.457381   | 6.603888 | 3.714308 |
| H  | 5.068358   | 7.643654 | 2.607372 |
| C  | 6.506583   | 5.796338 | 1.093249 |
| H  | 5.858525   | 6.260775 | 0.559456 |
| H  | 6.081652   | 5.065762 | 1.548341 |
| H  | 7.205272   | 5.458446 | 0.526949 |
| Cl | 8.414795   | 7.704971 | 5.139637 |
| Cl | 10.488848  | 7.218224 | 2.585131 |
| Cl | 9.210078   | 4.207335 | 2.092057 |
| Cl | 7.129158   | 4.615675 | 4.589078 |
| Ir | 8.749208   | 5.976764 | 3.580551 |
| N  | 13.236422  | 6.534744 | 7.173698 |
| N  | 11.446709  | 7.085286 | 5.770778 |
| H  | 10.977624  | 7.693229 | 5.384121 |
| N  | 13.768436  | 4.365192 | 7.680117 |
| H  | 13.524094  | 3.540684 | 7.705780 |
| N  | 11.336392  | 3.622874 | 5.921335 |
| H  | 11.593001  | 2.845333 | 6.183099 |

|    |           |           |           |
|----|-----------|-----------|-----------|
| N  | 10.157956 | 5.179262  | 4.869148  |
| O  | 7.599196  | 8.109397  | 1.548341  |
| S  | 7.192907  | 6.900554  | 2.274094  |
| C  | -0.241010 | 13.933131 | 2.000012  |
| H  | -0.451033 | 14.833305 | 1.899070  |
| C  | 1.104132  | 12.288030 | 2.940993  |
| C  | 0.353921  | 11.360460 | 2.284017  |
| C  | -0.732163 | 11.738794 | 1.491882  |
| C  | 1.938509  | 10.409406 | 3.452544  |
| H  | 2.480325  | 9.750583  | 3.823804  |
| C  | -2.774387 | 11.249569 | 0.222414  |
| H  | -2.625687 | 11.385247 | -0.725411 |
| H  | -3.108610 | 12.079294 | 0.597095  |
| C  | -3.811407 | 10.136745 | 0.427719  |
| H  | -3.530305 | 9.334416  | -0.039350 |
| H  | -3.887376 | 9.926704  | 1.372121  |
| C  | -5.127933 | 10.588137 | -0.095809 |
| H  | -5.314244 | 11.472655 | 0.225835  |
| H  | -5.815189 | 9.988021  | 0.205305  |
| H  | -5.105900 | 10.593355 | -1.055609 |
| C  | 6.495279  | 13.880947 | 5.348192  |
| H  | 6.272163  | 14.599782 | 4.752808  |
| H  | 6.800897  | 13.126888 | 4.840063  |
| H  | 7.189920  | 14.166654 | 5.946998  |
| C  | 5.751694  | 12.319341 | 7.461125  |
| H  | 6.399750  | 12.783778 | 7.994918  |
| H  | 6.176623  | 11.588765 | 7.006032  |
| H  | 5.053006  | 11.981449 | 8.027424  |
| Cl | 3.843483  | 14.227971 | 3.414734  |
| Cl | 1.769430  | 13.741224 | 5.969240  |
| Cl | 3.048200  | 10.730338 | 6.462314  |
| Cl | 5.129120  | 11.138678 | 3.965293  |
| Ir | 3.509070  | 12.499767 | 4.973819  |
| N  | -0.978144 | 13.057744 | 1.380675  |
| N  | 0.811569  | 13.608286 | 2.783592  |
| H  | 1.280654  | 14.216229 | 3.170250  |
| N  | -1.510157 | 10.888195 | 0.874257  |
| H  | -1.265816 | 10.063687 | 0.848594  |
| N  | 0.921886  | 10.145877 | 2.633035  |
| H  | 0.665277  | 9.368336  | 2.371271  |
| N  | 2.100323  | 11.702265 | 3.685223  |
| O  | 4.659083  | 14.632397 | 7.006032  |
| S  | 5.065371  | 13.423554 | 6.280277  |
| C  | -4.327285 | 5.635872  | -6.554362 |
| H  | -4.537308 | 4.735698  | -6.655303 |
| C  | -2.982143 | 7.280976  | -5.613378 |
| C  | -3.732354 | 8.208546  | -6.270353 |
| C  | -4.818438 | 7.830212  | -7.062491 |
| C  | -2.147766 | 9.159600  | -5.101826 |
| H  | -1.605950 | 9.818423  | -4.730567 |
| C  | -6.860665 | 8.319437  | -8.331960 |
| H  | -6.711965 | 8.183759  | -9.279784 |
| H  | -7.194888 | 7.489712  | -7.957278 |
| C  | -7.897685 | 9.432261  | -8.126655 |
| H  | -7.616583 | 10.234590 | -8.593723 |



|    |           |           |           |
|----|-----------|-----------|-----------|
| H  | -7.973654 | 9.642302  | -7.182252 |
| C  | -9.214211 | 8.980869  | -8.650182 |
| H  | -9.400523 | 8.096351  | -8.328538 |
| H  | -9.901467 | 9.580985  | -8.349068 |
| H  | -9.192178 | 8.975651  | -9.609983 |
| C  | 2.409002  | 5.688056  | -3.206178 |
| H  | 2.185888  | 4.969221  | -3.801562 |
| H  | 2.714619  | 6.442115  | -3.714308 |
| H  | 3.103642  | 5.402349  | -2.607372 |
| C  | 1.665418  | 7.249665  | -1.093249 |
| H  | 2.313475  | 6.785228  | -0.559456 |
| H  | 2.090348  | 7.980241  | -1.548341 |
| H  | 0.966731  | 7.587557  | -0.526949 |
| Cl | -0.242792 | 5.341032  | -5.139637 |
| Cl | -2.316845 | 5.827779  | -2.585131 |
| Cl | -1.038075 | 8.838668  | -2.092057 |
| Cl | 1.042845  | 8.430328  | -4.589078 |
| Ir | -0.577205 | 7.069239  | -3.580551 |
| N  | -5.064419 | 6.511262  | -7.173698 |
| N  | -3.274706 | 5.960717  | -5.770778 |
| H  | -2.805621 | 5.352774  | -5.384121 |
| N  | -5.596433 | 8.680811  | -7.680117 |
| H  | -5.352091 | 9.505319  | -7.705780 |
| N  | -3.164389 | 9.423129  | -5.921335 |
| H  | -3.420998 | 10.200670 | -6.183099 |
| N  | -1.985953 | 7.866741  | -4.869148 |
| O  | 0.572807  | 4.936606  | -1.548341 |
| S  | 0.979096  | 6.145449  | -2.274094 |
| C  | 3.845266  | 5.635872  | 10.554385 |
| H  | 3.635242  | 4.735698  | 10.453444 |
| C  | 5.190407  | 7.280976  | 11.495366 |
| C  | 4.440196  | 8.208546  | 10.838390 |
| C  | 3.354112  | 7.830212  | 10.046256 |
| C  | 6.024785  | 9.159600  | 12.006917 |
| H  | 6.566603  | 9.818423  | 12.378177 |
| C  | 1.311888  | 8.319437  | 8.776787  |
| H  | 1.460588  | 8.183759  | 7.828963  |
| H  | 0.977666  | 7.489712  | 9.151468  |
| C  | 0.274868  | 9.432261  | 8.982092  |
| H  | 0.555970  | 10.234590 | 8.515023  |
| H  | 0.198899  | 9.642302  | 9.926494  |
| C  | -1.041658 | 8.980869  | 8.458564  |
| H  | -1.227969 | 8.096351  | 8.780209  |
| H  | -1.728913 | 9.580985  | 8.759678  |
| H  | -1.019624 | 8.975651  | 7.498764  |
| C  | 10.581556 | 5.688056  | 13.902566 |
| H  | 10.358441 | 4.969221  | 13.307182 |
| H  | 10.887172 | 6.442115  | 13.394436 |
| H  | 11.276195 | 5.402349  | 14.501372 |
| C  | 9.837972  | 7.249665  | 16.015495 |
| H  | 10.486029 | 6.785228  | 16.549288 |
| H  | 10.262901 | 7.980241  | 15.560403 |
| H  | 9.139284  | 7.587557  | 16.581795 |
| Cl | 7.929761  | 5.341032  | 11.969107 |
| Cl | 5.855705  | 5.827779  | 14.523613 |

|    |          |           |           |
|----|----------|-----------|-----------|
| Cl | 7.134479 | 8.838668  | 15.016687 |
| Cl | 9.215398 | 8.430328  | 12.519666 |
| Ir | 7.595348 | 7.069239  | 13.528192 |
| N  | 3.108131 | 6.511262  | 9.935049  |
| N  | 4.897844 | 5.960717  | 11.337966 |
| H  | 5.366930 | 5.352774  | 11.724623 |
| N  | 2.576118 | 8.680811  | 9.428630  |
| H  | 2.820460 | 9.505319  | 9.402967  |
| N  | 5.008161 | 9.423129  | 11.187409 |
| H  | 4.751552 | 10.200670 | 10.925645 |
| N  | 6.186598 | 7.866741  | 12.239596 |
| O  | 8.745361 | 4.936606  | 15.560403 |
| S  | 9.151649 | 6.145449  | 14.834650 |

PtKIN PBE0/def2-TZVPP/COSMO optimized geometry:

|    |           |           |          |
|----|-----------|-----------|----------|
| C  | 6.623473  | 4.583760  | 9.038898 |
| O  | 6.025791  | 5.519085  | 8.264819 |
| C  | 5.041410  | 4.894922  | 7.570113 |
| C  | 5.007231  | 3.578785  | 7.893682 |
| C  | 6.039820  | 3.376083  | 8.858019 |
| C  | 4.227298  | 5.725741  | 6.652699 |
| N  | 4.991937  | 6.220643  | 5.514216 |
| C  | 5.409381  | 7.463743  | 5.368937 |
| N  | 5.119994  | 8.379592  | 6.318633 |
| C  | 5.527949  | 9.609350  | 6.202022 |
| N  | 6.242001  | 10.084004 | 5.173048 |
| C  | 6.558780  | 9.221517  | 4.186946 |
| C  | 6.157589  | 7.905956  | 4.253326 |
| N  | 6.645872  | 7.326780  | 3.110389 |
| C  | 7.293553  | 8.258459  | 2.420287 |
| N  | 7.260139  | 9.430562  | 3.046711 |
| H  | 5.288645  | 10.320880 | 6.981576 |
| H  | 6.590952  | 11.039349 | 5.137997 |
| H  | 5.226549  | 5.549807  | 4.799896 |
| H  | 7.777740  | 8.084974  | 1.474535 |
| H  | 3.403364  | 5.124843  | 6.270718 |
| H  | 3.811624  | 6.589854  | 7.167757 |
| H  | 4.326378  | 2.843556  | 7.494911 |
| H  | 6.309873  | 2.454268  | 9.347634 |
| H  | 7.437103  | 4.928383  | 9.655412 |
| H  | 6.537112  | 6.371613  | 2.804458 |
| Pt | 8.079682  | 11.172099 | 2.323301 |
| Cl | 8.989529  | 13.104263 | 1.495289 |
| Cl | 6.059143  | 12.259341 | 2.732780 |
| Cl | 7.342053  | 10.589277 | 0.203799 |
| Cl | 10.065937 | 10.031730 | 1.946486 |
| Cl | 8.805156  | 11.743166 | 4.468247 |

PtKIN B3LYP/def2-TZVPP/COSMO optimized geometry:

|    |           |           |          |
|----|-----------|-----------|----------|
| C  | 6.648599  | 4.623107  | 8.994618 |
| O  | 6.028418  | 5.540126  | 8.225206 |
| C  | 5.044974  | 4.903293  | 7.554216 |
| C  | 5.029965  | 3.600398  | 7.885278 |
| C  | 6.081387  | 3.416960  | 8.834387 |
| C  | 4.209969  | 5.714909  | 6.640948 |
| N  | 4.963874  | 6.229554  | 5.504725 |
| C  | 5.386621  | 7.464166  | 5.374451 |
| N  | 5.106068  | 8.372142  | 6.325497 |
| C  | 5.517751  | 9.592925  | 6.216091 |
| N  | 6.232288  | 10.066821 | 5.196060 |
| C  | 6.546393  | 9.210792  | 4.207148 |
| C  | 6.135493  | 7.909552  | 4.267343 |
| N  | 6.612156  | 7.330041  | 3.120310 |
| C  | 7.260526  | 8.254248  | 2.440635 |
| N  | 7.244817  | 9.418383  | 3.067862 |
| H  | 5.283372  | 10.294582 | 6.992774 |
| H  | 6.569834  | 11.014767 | 5.176700 |
| H  | 5.195095  | 5.572243  | 4.788318 |
| H  | 7.734321  | 8.079522  | 1.500243 |
| H  | 3.409469  | 5.100323  | 6.257647 |
| H  | 3.775944  | 6.557083  | 7.156268 |
| H  | 4.358028  | 2.859550  | 7.506408 |
| H  | 6.367901  | 2.509356  | 9.321452 |
| H  | 7.461660  | 4.975911  | 9.590857 |
| H  | 6.493077  | 6.386001  | 2.810343 |
| Pt | 8.103550  | 11.156801 | 2.333604 |
| Cl | 9.049905  | 13.077366 | 1.498932 |
| Cl | 6.075749  | 12.264894 | 2.695295 |
| Cl | 7.397959  | 10.558195 | 0.196796 |
| Cl | 10.093162 | 9.988362  | 2.006357 |
| Cl | 8.804717  | 11.743991 | 4.490757 |

PtKIN MP2/def2-TZVPP/COSMO optimized geometry:

|   |          |           |          |
|---|----------|-----------|----------|
| C | 6.644729 | 4.553519  | 8.965689 |
| O | 6.030397 | 5.516568  | 8.213476 |
| C | 4.995339 | 4.905695  | 7.560920 |
| C | 4.943637 | 3.582509  | 7.887955 |
| C | 6.019253 | 3.353576  | 8.809527 |
| C | 4.174874 | 5.757395  | 6.655816 |
| N | 4.963882 | 6.242896  | 5.519527 |
| C | 5.428183 | 7.473077  | 5.402840 |
| N | 5.139448 | 8.394609  | 6.357580 |
| C | 5.568170 | 9.629268  | 6.230672 |
| N | 6.286270 | 10.098000 | 5.199651 |
| C | 6.614304 | 9.222722  | 4.217485 |
| C | 6.213449 | 7.901961  | 4.300024 |
| N | 6.714228 | 7.298564  | 3.174115 |
| C | 7.373821 | 8.225934  | 2.466810 |
| N | 7.329552 | 9.415743  | 3.072303 |

|    |           |           |          |
|----|-----------|-----------|----------|
| H  | 5.338462  | 10.345590 | 7.005634 |
| H  | 6.631739  | 11.052937 | 5.175575 |
| H  | 5.201415  | 5.570772  | 4.805117 |
| H  | 7.865112  | 8.028379  | 1.531496 |
| H  | 3.349515  | 5.166410  | 6.265535 |
| H  | 3.775828  | 6.624476  | 7.172134 |
| H  | 4.229300  | 2.867352  | 7.516485 |
| H  | 6.291797  | 2.427818  | 9.286784 |
| H  | 7.493916  | 4.878803  | 9.539975 |
| H  | 6.623865  | 6.331744  | 2.893759 |
| Pt | 8.040099  | 11.169795 | 2.298169 |
| Cl | 8.809446  | 13.130497 | 1.427258 |
| Cl | 5.959209  | 12.123704 | 2.675039 |
| Cl | 7.332113  | 10.496369 | 0.207097 |
| Cl | 10.088188 | 10.162023 | 1.935937 |
| Cl | 8.753502  | 11.837659 | 4.407141 |

IrBAP PBE0/def2-TZVPP/COSMO optimized geometry:

|    |           |           |           |
|----|-----------|-----------|-----------|
| C  | 2.828044  | 2.979006  | 5.166452  |
| C  | 3.781976  | 1.966139  | 5.093085  |
| C  | 5.109361  | 2.265029  | 5.376236  |
| C  | 5.482347  | 3.556185  | 5.728471  |
| C  | 4.527552  | 4.559863  | 5.796686  |
| C  | 3.197904  | 4.268342  | 5.514769  |
| C  | 3.380486  | 0.563697  | 4.719383  |
| N  | 2.956506  | 0.454488  | 3.331386  |
| C  | 1.711002  | 0.288210  | 2.922826  |
| C  | 1.352834  | 0.166021  | 1.561924  |
| C  | 0.028409  | -0.009300 | 1.221317  |
| N  | -0.921462 | -0.053681 | 2.177993  |
| C  | -0.524312 | 0.071352  | 3.447819  |
| N  | 0.711965  | 0.229252  | 3.830942  |
| N  | 2.023880  | 0.172072  | 0.366781  |
| C  | 1.125567  | 0.007979  | -0.604562 |
| N  | -0.105086 | -0.111385 | -0.121439 |
| Ir | -1.811859 | -0.478796 | -1.279274 |
| S  | -3.604864 | -0.899202 | -2.561104 |
| Cl | -0.500327 | -1.924330 | -2.607340 |
| Cl | -3.019449 | 0.979224  | 0.137785  |
| Cl | -1.162018 | 1.356002  | -2.609571 |
| Cl | -2.319872 | -2.260832 | 0.193893  |
| H  | 1.371867  | -0.030935 | -1.651683 |
| H  | -1.305026 | 0.040781  | 4.196269  |
| H  | 3.677691  | 0.521387  | 2.631248  |
| H  | 2.554922  | 0.217860  | 5.337783  |
| H  | 6.520222  | 3.776038  | 5.948807  |
| H  | 4.815981  | 5.567562  | 6.071143  |
| H  | 2.447110  | 5.047508  | 5.571906  |
| H  | 1.787960  | 2.754407  | 4.956632  |
| H  | 4.219758  | -0.117543 | 4.861655  |
| H  | 5.857258  | 1.481163  | 5.325029  |
| H  | -1.902426 | -0.108490 | 1.900684  |
| O  | -4.871642 | -0.236599 | -2.226427 |

|   |           |           |           |
|---|-----------|-----------|-----------|
| C | -3.915569 | -2.642985 | -2.655082 |
| C | -3.249902 | -0.559190 | -4.265417 |
| H | -4.109931 | -0.895443 | -4.843192 |
| H | -3.104904 | 0.514082  | -4.356189 |
| H | -2.340259 | -1.087496 | -4.545282 |
| H | -4.715181 | -2.786828 | -3.380744 |
| H | -2.998076 | -3.145191 | -2.956515 |
| H | -4.215767 | -2.970547 | -1.663170 |
| H | 3.016180  | 0.264393  | 0.214186  |

IrBAP BHLYP/def2-TZVPP/COSMO optimized geometry:

|    |           |           |           |
|----|-----------|-----------|-----------|
| C  | 2.822841  | 2.965312  | 5.229915  |
| C  | 3.786610  | 1.976448  | 5.096548  |
| C  | 5.113374  | 2.296169  | 5.321150  |
| C  | 5.476854  | 3.584125  | 5.672673  |
| C  | 4.512526  | 4.563400  | 5.799778  |
| C  | 3.182525  | 4.250882  | 5.577566  |
| C  | 3.396379  | 0.574187  | 4.719157  |
| N  | 2.954537  | 0.468491  | 3.335145  |
| C  | 1.716144  | 0.290989  | 2.936655  |
| C  | 1.354180  | 0.168999  | 1.582503  |
| C  | 0.043272  | -0.023422 | 1.244176  |
| N  | -0.899409 | -0.086594 | 2.202657  |
| C  | -0.502781 | 0.040340  | 3.465464  |
| N  | 0.723773  | 0.217882  | 3.842599  |
| N  | 2.027423  | 0.183483  | 0.389241  |
| C  | 1.136301  | 0.008602  | -0.572757 |
| N  | -0.086651 | -0.124778 | -0.095107 |
| Ir | -1.793209 | -0.478853 | -1.277471 |
| S  | -3.614450 | -0.885293 | -2.611033 |
| Cl | -0.491715 | -1.979263 | -2.590302 |
| Cl | -3.004318 | 1.029547  | 0.111448  |
| Cl | -1.105089 | 1.343382  | -2.639876 |
| Cl | -2.366615 | -2.252799 | 0.211546  |
| H  | 1.383774  | -0.024297 | -1.610385 |
| H  | -1.273324 | -0.007427 | 4.210024  |
| H  | 3.663605  | 0.539493  | 2.634809  |
| H  | 2.594424  | 0.215334  | 5.343417  |
| H  | 6.510822  | 3.818688  | 5.846068  |
| H  | 4.792107  | 5.564003  | 6.073060  |
| H  | 2.427205  | 5.007919  | 5.680467  |
| H  | 1.787177  | 2.726833  | 5.067020  |
| H  | 4.239323  | -0.091336 | 4.839611  |
| H  | 5.867609  | 1.535848  | 5.225371  |
| H  | -1.869577 | -0.186507 | 1.949985  |
| O  | -4.848747 | -0.171416 | -2.306321 |
| C  | -3.988121 | -2.614405 | -2.661573 |
| C  | -3.225782 | -0.591740 | -4.312705 |
| H  | -4.083723 | -0.905303 | -4.890122 |
| H  | -3.046623 | 0.465067  | -4.424413 |
| H  | -2.341947 | -1.152217 | -4.575371 |
| H  | -4.775858 | -2.746272 | -3.389548 |
| H  | -3.098079 | -3.160204 | -2.934687 |

|   |           |           |           |
|---|-----------|-----------|-----------|
| H | -4.317154 | -2.902547 | -1.676553 |
| H | 3.009238  | 0.298516  | 0.236262  |

IrBAP MP2 /def2-TZVPP/COSMO optimized geometry:

|    |           |           |           |
|----|-----------|-----------|-----------|
| C  | 3.046218  | 3.301458  | 5.225044  |
| C  | 3.772372  | 2.106834  | 5.165628  |
| C  | 5.153683  | 2.135947  | 5.366533  |
| C  | 5.804299  | 3.344513  | 5.625650  |
| C  | 5.075049  | 4.531153  | 5.685243  |
| C  | 3.692698  | 4.508269  | 5.483786  |
| C  | 3.065398  | 0.807028  | 4.881579  |
| N  | 2.659335  | 0.748828  | 3.470858  |
| C  | 1.479012  | 0.343478  | 3.030705  |
| C  | 1.142367  | 0.293342  | 1.652084  |
| C  | -0.112799 | -0.145560 | 1.263531  |
| N  | -1.018574 | -0.529768 | 2.198501  |
| C  | -0.647379 | -0.458482 | 3.484674  |
| N  | 0.524722  | -0.044618 | 3.917044  |
| N  | 1.796429  | 0.586959  | 0.483712  |
| C  | 0.952980  | 0.329952  | -0.531869 |
| N  | -0.227400 | -0.116364 | -0.094480 |
| Ir | -1.864044 | -0.545679 | -1.317844 |
| S  | -3.564055 | -0.978539 | -2.659052 |
| Cl | -0.433727 | -1.842981 | -2.639245 |
| Cl | -3.147581 | 0.777061  | 0.122402  |
| Cl | -1.308980 | 1.368554  | -2.540738 |
| Cl | -2.321694 | -2.416338 | 0.034671  |
| H  | 1.206201  | 0.476605  | -1.565748 |
| H  | -1.385423 | -0.774581 | 4.206479  |
| H  | 3.359981  | 0.991179  | 2.786319  |
| H  | 2.165568  | 0.707464  | 5.480755  |
| H  | 6.874884  | 3.357194  | 5.783138  |
| H  | 5.577296  | 5.467683  | 5.888523  |
| H  | 3.122197  | 5.426256  | 5.533863  |
| H  | 1.972988  | 3.284205  | 5.073109  |
| H  | 3.718837  | -0.039782 | 5.089956  |
| H  | 5.721390  | 1.214160  | 5.325093  |
| H  | -1.926146 | -0.887995 | 1.912601  |
| O  | -4.863405 | -0.335029 | -2.389504 |
| C  | -3.859611 | -2.728219 | -2.781428 |
| C  | -3.147033 | -0.630560 | -4.352418 |
| H  | -3.993060 | -0.965409 | -4.949048 |
| H  | -3.009163 | 0.442269  | -4.433651 |
| H  | -2.231048 | -1.155000 | -4.609519 |
| H  | -4.567597 | -2.866877 | -3.594717 |
| H  | -2.917050 | -3.236576 | -2.971100 |
| H  | -4.284617 | -3.044317 | -1.834339 |
| H  | 2.735333  | 0.941550  | 0.369311  |
